# Supplementary material for: Mps1 Mediated Phosphorylation of Hsp90 Confers Renal Cell Carcinoma Sensitivity and Selectivity to Hsp90 Inhibitors
Source: PubMed Central journal article supplement — Cell Rep. Author manuscript; Available in PMC 2016 May 31. (PMC4887101; doi:10.1016/j.celrep.2015.12.084), 2016-01-21
Supplement: NIHMS787635-supplement-supplement_1.pdf [file NIHMS787635-supplement-supplement_1.pdf]

Cell Reports

Supplemental Information

# **Mps1 Mediated Phosphorylation of Hsp90 Confers Renal Cell Carcinoma Sensitivity and Selectivity to Hsp90 Inhibitors**

**Mark R. Woodford, Andrew W. Truman, Diana M. Dunn, Sandra M. Jensen, Richard Cotran, Renee Bullard, Mourad Abouelleil, Kristin Beebe, Donald Wolfgeher, Sara Wierzbicki, Dawn E. Post, Tiffany Caza, Shinji Tsutsumi, Barry Panaretou, Stephen J. Kron, Jane B. Trepel, Steve Landas, Chrisostomos Prodromou, Oleg Shapiro, William G. Stetler-Stevenson, Dimitra Bourboulia, Len Neckers, Gennady Bratslavsky, and Mehdi Mollapour**

# Supplemental Data

## Figure S1

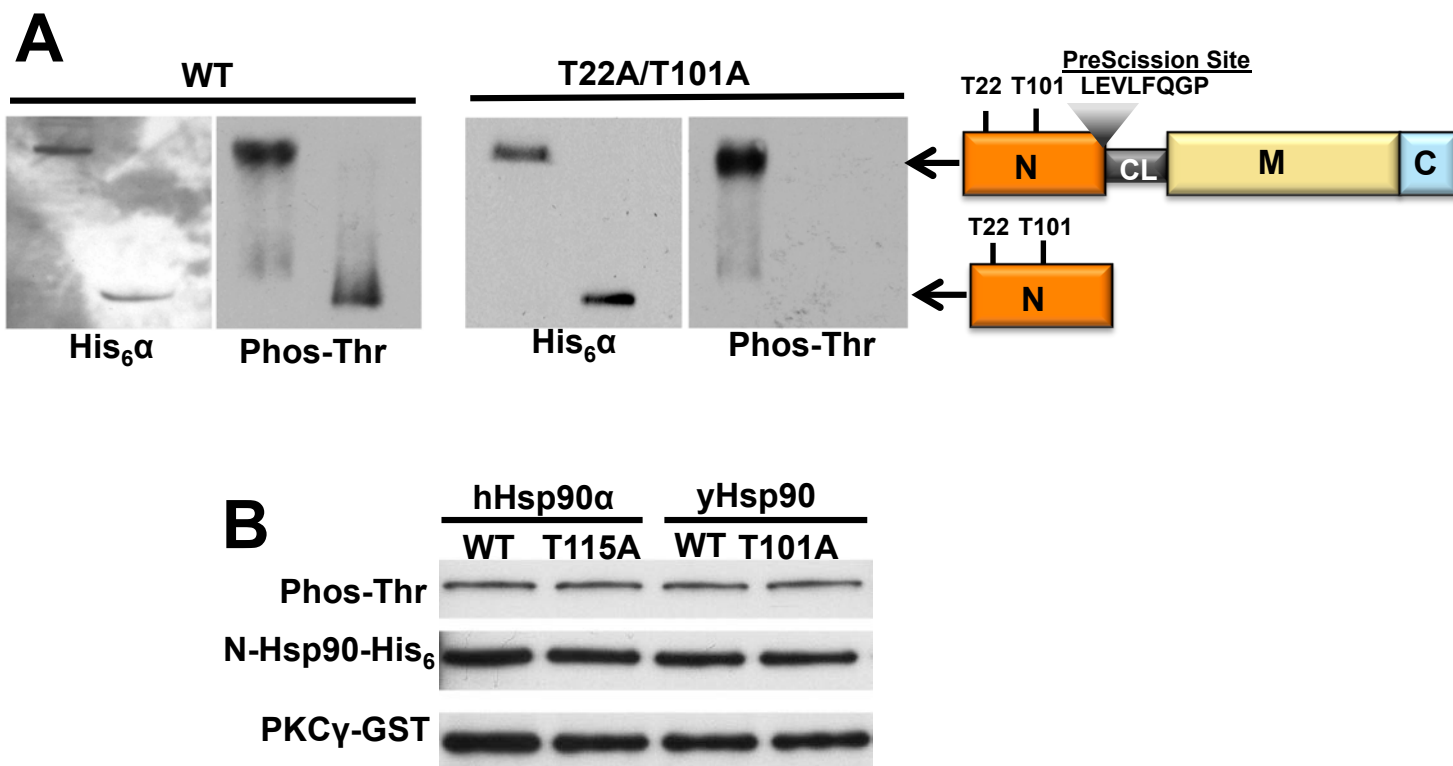

**Figure S1, Related to Figure 1. T22 and T101 are the only phosphorylated threonine sites in the yeast Hsp90 N-domain and PKC $\gamma$  does not phosphorylate T101-yHsp90 and T115-hHsp90.**

- A) Wild-type yeast strains expressing yHsp90-His<sub>6</sub> (WT) or T22A/T101A double mutants containing PreScission site inserted between the N-domain and charged-linker were isolated by Ni-NTA agarose and N-domains were isolated after PreScission protease digest. N-domains were detected by immunoblotting with anti-hexahistidine and threonine phosphorylation was examined by pan-anti-phospho-threonine antibodies.
- B) Bacterially expressed and purified yHsp90-His<sub>6</sub>, T101A mutant hHsp90a-His<sub>6</sub> and T115A mutant were bound to Ni-NTA agarose and in vitro kinase assay was carried by addition of Insect-expressed and purified PKC $\gamma$ . All Hsp90 constructs had PreScission site inserted between the N-domain and charged-linker. Threonine phosphorylation of Hsp90 N-domain was assessed after PreScission digest and immunoblotting using pan-anti-phospho-threonine antibody.



**Figure S2, Related to Figure 1. Identification of yMps1 protein kinase targeting T101-yHsp90.**

- A) EUROSCARF collection of haploid non-essential kinase deletes in BY4741 were transformed with yHsp90-His<sub>6</sub>-Presc, expressed, isolated, and cleaved with PreScission protease. Pull-down proteins were spotted on to nitrocellulose membrane. N-domain yHsp90 and
- B) Threonine phosphorylation was detected by immunoblotting with anti-hexahistidine and pan-anti-phospho threonine antibodies respectively. Empty plasmid (C1) and T101A mutant was used as negative controls. N-domain wild type (WT) yHsp90 and N-domain T22AT101A (C2) were also used as controls.
- C) Yeast essential kinases were over-expressed and detected by immunoblotting with anti-GST antibody.
- D) Threonine phosphorylation of the N-domain Hsp90 was examined by immunoblotting with pan-anti-phospho-threonine antibody.

# Figure S3

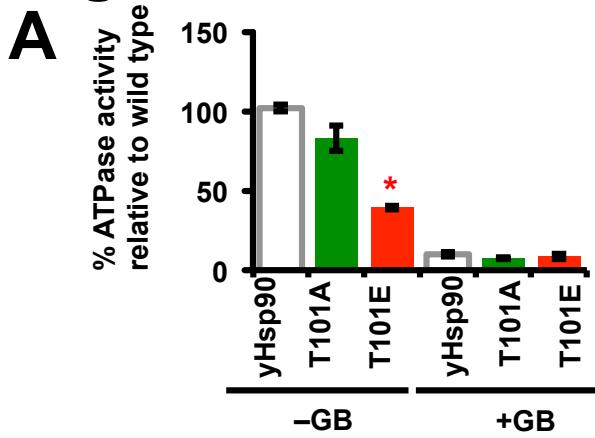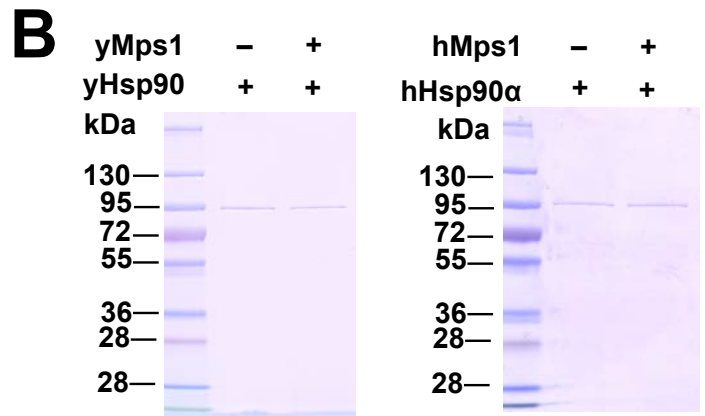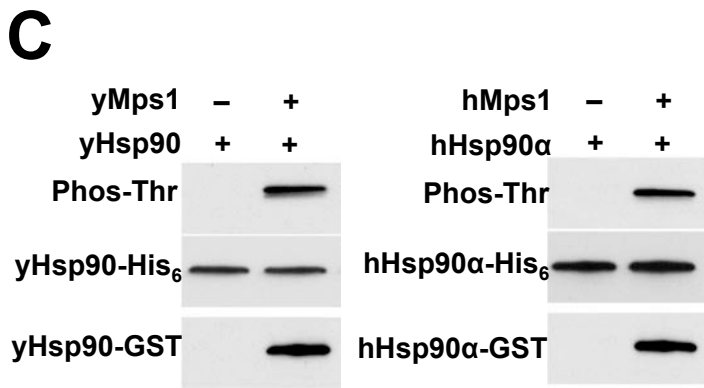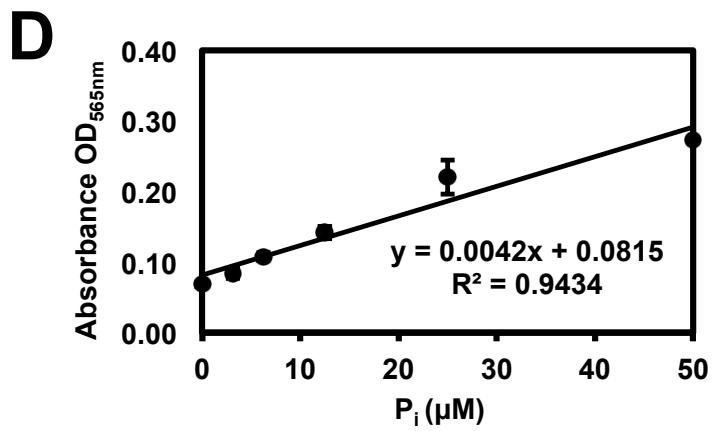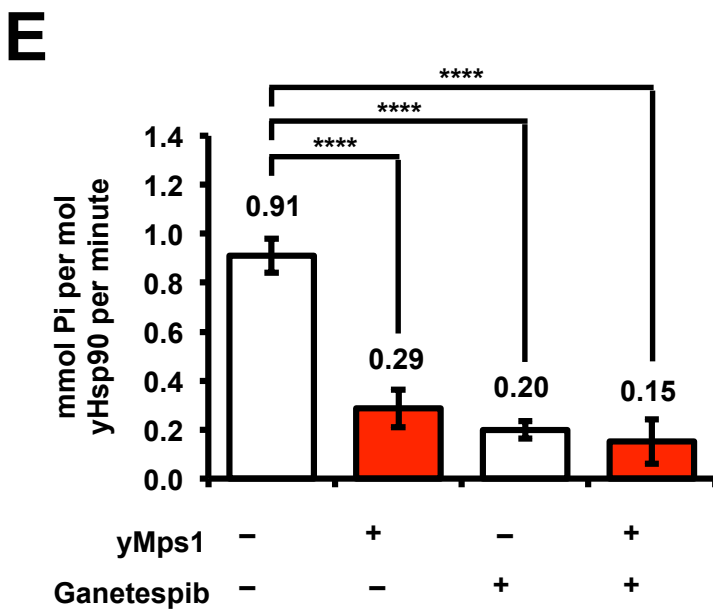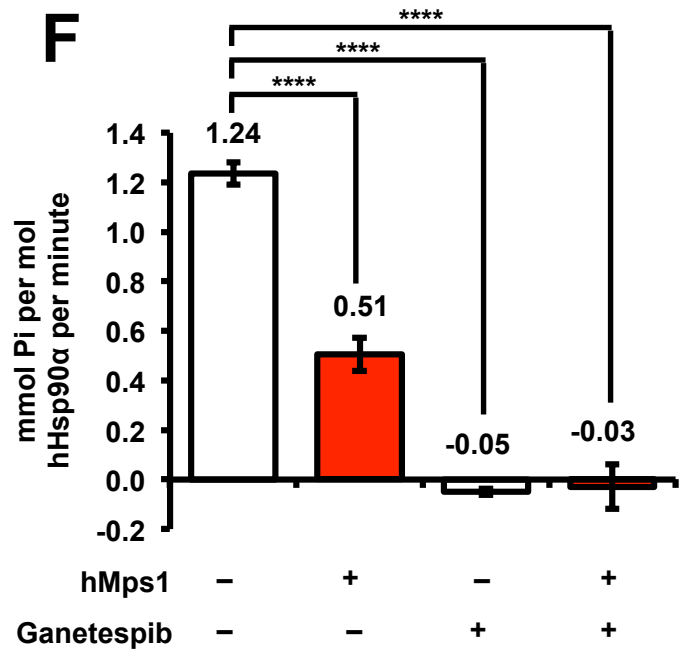

**Figure S3, Related to Figure 2. Impact of yMps1 mediate phosphorylation of T101-yHsp90 and T115-hHsp90 $\alpha$  on the ATPase activity.**

- A) Relative ATPase activity of wild-type yHsp90-His<sub>6</sub>, T101A, and T101E mutants expressed and isolated from yeast. ATPase activity was inhibited by addition 10 $\mu$ M ganetespiib (GB). Error bars represent standard deviation of three independent experiments. \*p < 0.05.
- B) 50ng of the recombinant yHsp90-His<sub>6</sub> and hHsp90-His<sub>6</sub> proteins before and after *in vitro* phosphorylation by Mps1 were resolved on the SDS-PAGE gel and stained with Coomassie stain.
- C) Phosphorylation of T101-yHsp90 and T115-hHsp90 $\alpha$  were confirmed by immunblotting.
- D) Inorganic phosphate (Pi) standard curve. The x-axis shows  $\mu$ M of Pi per assay and the y-axis shows absorbance at 565nm. Mean  $\pm$  S.D. from values obtained in three independent experiments.
- E) and
- F) ATPase activity of Hsp90 from B) and C) with or without 10 $\mu$ M ganetespiib. Mean  $\pm$  S.D. presented from three independent experiments. Mean  $\pm$  S.D. from values obtained in three independent experiments with \*\*p < 0.0001.

# Figure S4

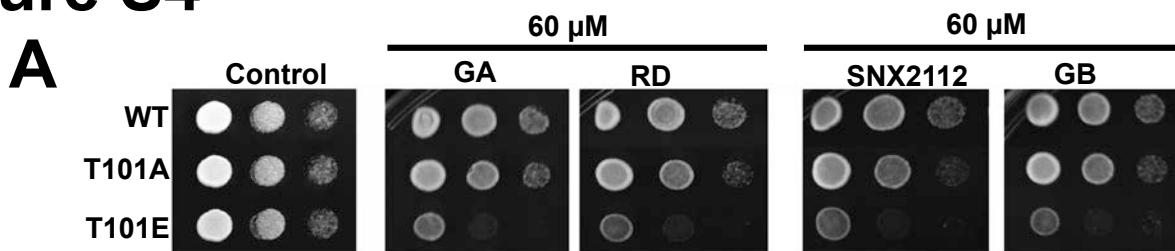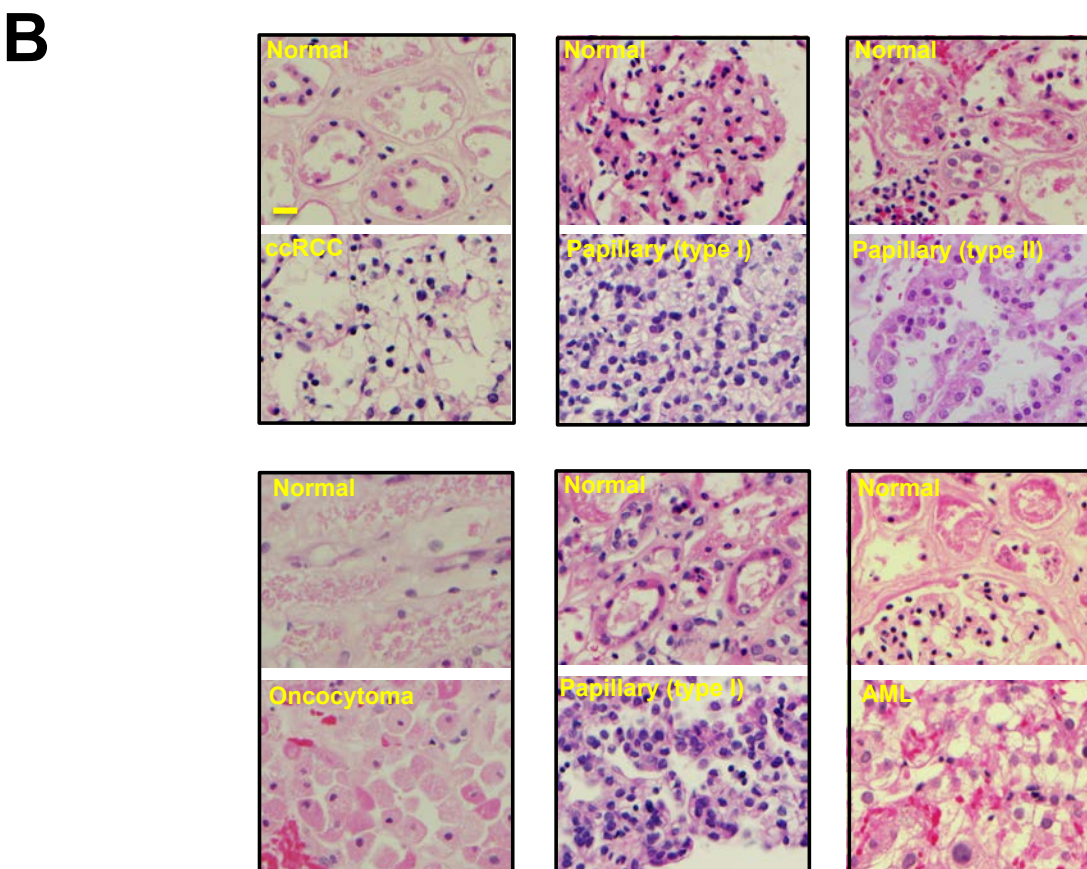

**Figure S4, Related to Figure 7. Mps1 phosphorylation of Hsp90 sensitizes yeast cells to Hsp90 inhibitors and H&E staining of the renal cell carcinoma tumors.**

A) Yeast expressing yHsp90-His<sub>6</sub> (WT), and indicated phospho-T101 mutants were spotted at a 1:10 dilution series of 10<sup>7</sup> cells/ml on YPDA agar containing 60  $\mu$ M Hsp90 inhibitors geldanamycin (GA), and radicicol (RD), or ganetespib (GB) and SNX2112. Plates were incubated at 28°C for 4 days.

B) Hematoxylin and eosin (H&E) staining of human renal cell carcinoma (RCC) tumors. Clear cell renal cell carcinoma (ccRCC), Papillary type I, type II, Oncocytoma, and angiomyolipoma (AML) were used for staining. Scale bar represents 20  $\mu$ m.

**Table S1.** Non-essential kinase deleted yeast strains used for screening of yHsp90-T101 phosphorylation. Related to Figure 1 and S2.

| No | ORF     | Gene                  | No | ORF     | Gene                  | No | ORF     | Gene                  | No  | ORF     | Gene                    |
|----|---------|-----------------------|----|---------|-----------------------|----|---------|-----------------------|-----|---------|-------------------------|
| 1  | YBR059C | <a href="#">AKL1</a>  | 29 | YLR113W | <a href="#">HOG1</a>  | 57 | YOL100W | <a href="#">PKH2</a>  | 85  | YDR523C | <a href="#">SPS1</a>    |
| 2  | YGL021W | <a href="#">ALK1</a>  | 30 | YOR267C | <a href="#">HRK1</a>  | 58 | YDR466W | <a href="#">PKH3</a>  | 86  | YNR031C | <a href="#">SSK2</a>    |
| 3  | YBL009W | <a href="#">ALK2</a>  | 31 | YKL101W | <a href="#">HSL1</a>  | 59 | YIL042C | <a href="#">PKP1</a>  | 87  | YCR073C | <a href="#">SSK22</a>   |
| 4  | YNL020C | <a href="#">ARK1</a>  | 32 | YPL204W | <a href="#">HRR25</a> | 60 | YGL059W | <a href="#">PKP2</a>  | 88  | YPL042C | <a href="#">SSN3</a>    |
| 5  | YGL180W | <a href="#">ATG1</a>  | 33 | YJL106W | <a href="#">IME2</a>  | 61 | YIL095W | <a href="#">PRK1</a>  | 89  | YLR362W | <a href="#">STE11</a>   |
| 6  | YJL095W | <a href="#">BCK1</a>  | 34 | YHR079C | <a href="#">IRE1</a>  | 62 | YKL116C | <a href="#">PRR1</a>  | 90  | YHL007C | <a href="#">STE20</a>   |
| 7  | YGR188C | <a href="#">BUB1</a>  | 35 | YPR106W | <a href="#">ISR1</a>  | 63 | YDL214C | <a href="#">PRR2</a>  | 91  | YDL159W | <a href="#">STE7</a>    |
| 8  | YGR262C | <a href="#">BUD32</a> | 36 | YCL024W | <a href="#">KCC4</a>  | 64 | YAL017W | <a href="#">PSK1</a>  | 92  | YJL187C | <a href="#">SWE1</a>    |
| 9  | YBR274W | <a href="#">CHK1</a>  | 37 | YKL161C | <a href="#">KDX1</a>  | 65 | YOL045W | <a href="#">PSK2</a>  | 93  | YBL088C | <a href="#">TEL1</a>    |
| 10 | YIL035C | <a href="#">CKA1</a>  | 38 | YDR122W | <a href="#">KIN1</a>  | 66 | YKL198C | <a href="#">PTK1</a>  | 94  | YJR066W | <a href="#">TOR1</a>    |
| 11 | YOR061W | <a href="#">CKA2</a>  | 39 | YLR096W | <a href="#">KIN2</a>  | 67 | YJR059W | <a href="#">PTK2</a>  | 95  | YGL179C | <a href="#">TOS3</a>    |
| 12 | YNL298W | <a href="#">CLA4</a>  | 40 | YAR018C | <a href="#">KIN3</a>  | 68 | YGL158W | <a href="#">RCK1</a>  | 96  | YJL164C | <a href="#">TPK1</a>    |
| 13 | YFR014C | <a href="#">CMK1</a>  | 41 | YOR233W | <a href="#">KIN4</a>  | 69 | YLR248W | <a href="#">RCK2</a>  | 97  | YPL203W | <a href="#">TPK2</a>    |
| 14 | YOL016C | <a href="#">CMK2</a>  | 42 | YCR091W | <a href="#">KIN82</a> | 70 | YMR139W | <a href="#">RIM11</a> | 98  | YKL166C | <a href="#">TPK3</a>    |
| 15 | YKL139W | <a href="#">CTK1</a>  | 43 | YKL168C | <a href="#">KKQ8</a>  | 71 | YFL033C | <a href="#">RIM15</a> | 99  | YDR247W | <a href="#">VHS1</a>    |
| 16 | YJL006C | <a href="#">CTK2</a>  | 44 | YLL019C | <a href="#">KNS1</a>  | 72 | YDL025C | <a href="#">RTK1</a>  | 100 | YBR097W | <a href="#">VPS15</a>   |
| 17 | YML112W | <a href="#">CTK3</a>  | 45 | YHR082C | <a href="#">KSP1</a>  | 73 | YER129W | <a href="#">SAK1</a>  | 101 | YLR240W | <a href="#">VPS34</a>   |
| 18 | YGR092W | <a href="#">DBF2</a>  | 46 | YGR040W | <a href="#">KSS1</a>  | 74 | YCR008W | <a href="#">SAT4</a>  | 102 | YJL141C | <a href="#">YAK1</a>    |
| 19 | YPR111W | <a href="#">DBF20</a> | 47 | YNL307C | <a href="#">MCK1</a>  | 75 | YHR205W | <a href="#">SCH9</a>  | 103 | YBR028C | <a href="#">YPK3</a>    |
| 20 | YDL101C | <a href="#">DUN1</a>  | 48 | YOR351C | <a href="#">MEK1</a>  | 76 | YDR422C | <a href="#">SIP1</a>  | 104 | YHR135C | <a href="#">YCK1</a>    |
| 21 | YKL048C | <a href="#">ELM1</a>  | 49 | YOR231W | <a href="#">MKK1</a>  | 77 | YGL208W | <a href="#">SIP2</a>  | 105 | YNL154C | <a href="#">YCK2</a>    |
| 22 | YNR047W | <a href="#">FPK1</a>  | 50 | YPL140C | <a href="#">MKK2</a>  | 78 | YOL113W | <a href="#">SKM1</a>  | 106 | YER123W | <a href="#">YCK3</a>    |
| 23 | YPL141C | <a href="#">FRK1</a>  | 51 | YDL079C | <a href="#">MRK1</a>  | 79 | YPL026C | <a href="#">SKS1</a>  | 107 | YOL128C | <a href="#">YGK3</a>    |
| 24 | YBL016W | <a href="#">FUS3</a>  | 52 | YKL171W | <a href="#">NNK1</a>  | 80 | YMR216C | <a href="#">SKY1</a>  | 108 | YMR291W | <a href="#">YMR291W</a> |
| 25 | YER027C | <a href="#">GAL83</a> | 53 | YNL183C | <a href="#">NPR1</a>  | 81 | YHR030C | <a href="#">SLT2</a>  | 109 | YKL126W | <a href="#">YPK1</a>    |
| 26 | YDR283C | <a href="#">GCN2</a>  | 54 | YJL128C | <a href="#">PBS2</a>  | 82 | YPR054W | <a href="#">SMK1</a>  | 110 | YMR104C | <a href="#">YPK2</a>    |
| 27 | YDR507C | <a href="#">GIN4</a>  | 55 | YPL031C | <a href="#">PHO85</a> | 83 | YDR477W | <a href="#">SNF1</a>  | 111 | YPL150W | <a href="#">YPL150W</a> |
| 28 | YJL165C | <a href="#">HAL5</a>  | 56 | YDR490C | <a href="#">PKH1</a>  | 84 | YGL115W | <a href="#">SNF4</a>  | 112 | YPL236C | <a href="#">ENV7</a>    |



**Table S2.** Interactors of yHsp90-His<sub>6</sub> and their associated interaction change upon T101 Phosphorylation (Log<sub>2</sub> Ratio yHsp90-His<sub>6</sub>-T101E/ yHsp90-His<sub>6</sub>-T101A). Related to Figure 5.

| Gene-Name | Log <sub>2</sub> Ratio E/A yHsp90 Norm |
|-----------|----------------------------------------|
| PAL1      | 3.70                                   |
| JLP1      | 3.26                                   |
| PMU1      | 2.95                                   |
| RPS9B     | 2.52                                   |
| YRA1      | 2.51                                   |
| MET3      | 2.14                                   |
| SHM1      | 1.99                                   |
| STM1      | 1.93                                   |
| ASC1      | 1.80                                   |
| YGR283C   | 1.69                                   |
| RPL30     | 1.60                                   |
| TSR1      | 1.45                                   |
| RPA135    | 1.43                                   |
| GUA1      | 1.34                                   |
| KRS1      | 1.29                                   |
| MDJ1      | 1.27                                   |
| CPS1      | 1.21                                   |
| MSN4      | 1.20                                   |
| NPL3      | 1.17                                   |
| NCL1      | 1.16                                   |
| CDC55     | 1.13                                   |
| SDH2      | 1.06                                   |
| ATP3      | 0.97                                   |
| AMD1      | 0.78                                   |
| VMA1      | 0.70                                   |
| CUE5      | 0.68                                   |
| AIM32     | 0.67                                   |
| UBA4      | 0.67                                   |
| YMR265C   | 0.64                                   |
| YMR087W   | 0.61                                   |
| GND1      | 0.54                                   |
| TUF1      | 0.52                                   |
| NMD3      | 0.50                                   |
| REB1      | 0.46                                   |
| CLU1      | 0.38                                   |
| CPR6      | 0.31                                   |
| AST2      | 0.30                                   |

|         |       |
|---------|-------|
| YCK2    | 0.30  |
| BDH1    | 0.27  |
| NOB1    | 0.26  |
| TES1    | 0.25  |
| PRO1    | 0.22  |
| ABF1    | 0.20  |
| DEF1    | 0.19  |
| CLB3    | 0.17  |
| RPS10B  | 0.15  |
| RIB4    | 0.14  |
| ARC1    | 0.14  |
| MET17   | 0.14  |
| DET1    | 0.11  |
| KCS1    | 0.10  |
| ALY2    | 0.07  |
| HSP82   | 0.00  |
| ESC1    | 0.00  |
| DIG1    | -0.04 |
| SSD1    | -0.06 |
| TPS1    | -0.08 |
| RPS27A  | -0.10 |
| CDC19   | -0.14 |
| RPC40   | -0.14 |
| RSP5    | -0.16 |
| HYP2    | -0.17 |
| BUL1    | -0.19 |
| RPS8A   | -0.21 |
| PMA1    | -0.22 |
| RPS31   | -0.25 |
| THG1    | -0.26 |
| MRPS18  | -0.29 |
| RCL1    | -0.30 |
| YGR250C | -0.35 |
| TDH3    | -0.38 |
| ILV2    | -0.39 |
| YEF3    | -0.39 |
| PAA1    | -0.40 |
| RPS22A  | -0.42 |
| RPL9A   | -0.47 |
| SSA1    | -0.50 |
| RPS3    | -0.52 |

|         |       |
|---------|-------|
| SGN1    | -0.54 |
| PDC1    | -0.56 |
| MSB1    | -0.60 |
| CDC48   | -0.62 |
| GTS1    | -0.62 |
| PPZ1    | -0.63 |
| RPS7B   | -0.65 |
| HBT1    | -0.66 |
| ASK10   | -0.66 |
| SSC1    | -0.69 |
| YPT1    | -0.70 |
| CAF20   | -0.70 |
| SSA2    | -0.71 |
| RPS5    | -0.74 |
| RPL31A  | -0.75 |
| RPL6B   | -0.77 |
| PGK1    | -0.77 |
| YMR102C | -0.78 |
| URA2    | -0.82 |
| BOI1    | -0.82 |
| BMH1    | -0.83 |
| KSP1    | -0.83 |
| HRR25   | -0.85 |
| RPL40A  | -0.87 |
| FPK1    | -0.87 |
| PSP2    | -0.87 |
| PET9    | -0.88 |
| RPS0A   | -0.88 |
| SRO9    | -0.88 |
| RNH1    | -0.95 |
| IST2    | -0.95 |
| PWP1    | -0.98 |
| GPD2    | -0.98 |
| PIG2    | -0.99 |
| KAR2    | -1.03 |
| YMR045C | -1.04 |
| DOT6    | -1.06 |
| RPS1A   | -1.07 |
| RPS1B   | -1.08 |
| MOT3    | -1.08 |
| AKL1    | -1.10 |

|         |       |
|---------|-------|
| RPL2A   | -1.10 |
| LGE1    | -1.10 |
| RPL29   | -1.12 |
| RGI1    | -1.13 |
| RPS23A  | -1.14 |
| UTP11   | -1.15 |
| GYP1    | -1.17 |
| LSM12   | -1.18 |
| RPL42A  | -1.18 |
| ATP1    | -1.20 |
| PBP1    | -1.21 |
| YHR097C | -1.21 |
| RPL3    | -1.21 |
| PBP4    | -1.22 |
| ATP2    | -1.25 |
| SSB2    | -1.25 |
| ENO2    | -1.26 |
| EFT1    | -1.27 |
| RPS13   | -1.29 |
| RRB1    | -1.30 |
| RPS4A   | -1.30 |
| BRE5    | -1.30 |
| CDC14   | -1.30 |
| RPL37B  | -1.35 |
| RPL23A  | -1.39 |
| RPS29A  | -1.41 |
| RIM4    | -1.42 |

|         |       |
|---------|-------|
| YGR237C | -1.42 |
| RPS18A  | -1.42 |
| SAR1    | -1.44 |
| PRP43   | -1.44 |
| RPL10   | -1.49 |
| RPL43A  | -1.51 |
| UBP3    | -1.52 |
| MRPL32  | -1.55 |
| MRM1    | -1.57 |
| TIF1    | -1.59 |
| ACC1    | -1.60 |
| RPL21A  | -1.66 |
| POR1    | -1.71 |
| HRK1    | -1.71 |
| RPL25   | -1.78 |
| SCS2    | -1.78 |
| RPL28   | -1.80 |
| RPS29B  | -1.80 |
| YGR266W | -1.80 |
| BEM2    | -1.80 |
| RTK1    | -1.84 |
| CYR1    | -1.84 |
| YCL019W | -1.86 |
| IPP1    | -1.91 |
| RPL19A  | -2.00 |
| ROM2    | -2.00 |
| RPL5    | -2.03 |

|        |       |
|--------|-------|
| SNF4   | -2.08 |
| BRE1   | -2.10 |
| ADE8   | -2.19 |
| SNF1   | -2.21 |
| RPL35A | -2.22 |
| RPL14A | -2.24 |
| DUF1   | -2.25 |
| PUF3   | -2.26 |
| PHO88  | -2.33 |
| SRV2   | -2.39 |
| RPL4A  | -2.40 |
| RPP2A  | -2.40 |
| RPL8A  | -2.42 |
| MHP1   | -2.45 |
| SIP2   | -2.47 |
| RPS2   | -2.49 |
| RPS24A | -2.51 |
| RPL13B | -2.53 |
| NMA1   | -2.55 |
| RPL4B  | -2.59 |
| RPL36B | -2.60 |
| GFA1   | -2.64 |
| RPP2B  | -2.72 |
| RPP1B  | -2.74 |
| RPL33A | -2.92 |
| RPP1A  | -4.01 |

**Table S3. Primer sequences.** Mutated sequences are highlighted in red. Restriction sites are green. Epitope sequences are highlighted in blue. Short flanking region (SFH) for yMps1 are underlined.

| Primer                  | Sequence                                                                                            |
|-------------------------|-----------------------------------------------------------------------------------------------------|
| yMps1-Hind-myc-F        | GTCAGCAT <b>AAGCTT</b> ATG <b>GAACAAAAGTTAATCTCCGAAGAAGAT</b><br><u>TTAGAGTTTTCAACAAACTCATTCCAT</u> |
| yMps1-Xho1-R            | TTCAGCT <b>CTCGAG</b> CTAAATTTTGTAACTCGCAAATTTCC                                                    |
| yMps1-myc-SFHF          | <u>GATGTGGTAGACACTGTTTTAAGGAAATTTGCAGATTACAAAAT</u><br><u>TTCCGGTTCTGCTGCTAGT</u>                   |
| yMps1-myc-SFHR          | <u>AATGTATTTATGTTTCATAACTGGCACATGCTTTTCTTCCTTATGC</u><br><u>GGCTCTTCCTCGAGGCCAGAAGAC</u>            |
| yMps1-200F              | ACTACCAAGGGTTGCAAAGAG                                                                               |
| yMps1-200R              | ATATAATATTTCACTGAGCGCCG                                                                             |
| KanR                    | TGTACGGGCGACAGTCACATC                                                                               |
| KanF                    | ATTTTAATCAAATGTTAGCG                                                                                |
| hMps1-F-BamHI-FLAG      | GTACCTT <b>GGATCC</b> ATG <b>GATTACAAAGACGATGACGATAAG</b> GAA<br>TCCGAGGATTTAAGTGCC                 |
| hMps1-RXho1             | GGATCGT <b>CTCGAG</b> TCATTTTTTTCCCTTTTTTTTTCAAAAAGTCT<br>TGGAGGAT                                  |
| HSP82T101AF             | CATTGCCAAGTCTGGT <b>GCC</b> AAAGCCTTCATGGAAG                                                        |
| HSP82T101AR             | CTTCCATGAAGGCTTT <b>GGC</b> ACCAGACTTGGCAATG                                                        |
| HSP82T101EF             | CATTGCCAAGTCTGGT <b>GAAAA</b> AGCCTTCATGGAAG                                                        |
| HSP82T101ER             | CTTCCATGAAGGCTTT <b>TTCC</b> ACCAGACTTGGCAATG                                                       |
| hHsp90 $\alpha$ T115A-F | ATCGCCAAGTCTGGG <b>GCC</b> AAAGCGTTCATGGAA                                                          |
| hHsp90 $\alpha$ T115A-R | TTCCATGAACGCTTT <b>GGC</b> CCCAGACTTGGCGAT                                                          |
| hHsp90 $\alpha$ T115E-F | ATCGCCAAGTCTGGG <b>GAG</b> AAAGCGTTCATGGAA                                                          |
| hHsp90 $\alpha$ T115E-R | TTCCATGAACGCTTT <b>CTC</b> CCCAGACTTGGCGAT                                                          |

## **SUPPLEMENTAL EXPERIMENTAL PROCEDURES**

### **Plasmids**

Yeast and bacterial expression plasmids containing pHsp82 (yHsp90) and pHsp90 $\alpha$  (hHsp90) with or without a PreScission protease cleavage site, (Panaretou et al. 1998; Millson et al. 2007) were derived using a QuickChange®II site directed mutagenesis kit (Stratagene) with primers listed in Table S3. Mutations were checked by DNA sequencing. GAL-hMps1-Myc-pYES2, pCDNA3-hMps1-FLAG plasmids were constructed with primers in Table S3.

### **Yeast Growth Media**

Yeast were grown on YPDA (2% (wt/vol) Bacto peptone, 1% yeast extract, 2% glucose, 20mg/liter adenine), YPGal (2% (wt/vol) Bacto peptone, 1% yeast extract, 2% galactose, 20mg/liter adenine), YPRaf (2% (wt/vol) Bacto peptone, 1% yeast extract, 2% raffinose, 20mg/liter adenine). Selective growth was on dropout 2% glucose (DO) medium with appropriate amino acids (Adams et al. 1997). Medium pH was adjusted to 6.8 with NaOH before autoclaving. 5-fluoroorotic acid (5-FOA) plates were prepared as previously described (Adams et al. 1997). Cell cycle arrest was achieved by addition of 2.5 $\mu$ g/ml  $\alpha$ 1-mating factor (Sigma) or 20 $\mu$ g/ml nocodazole (Sigma).

### **Mammalian Cell Culture**

The human breast cancer cell line SkBr3 (ATCC) was cultured in McCoy's 5A media (GIBCO) supplemented with 10% fetal bovine serum (FBS, Invitrogen). The human embryonal kidney cell line HEK293 were grown in Dulbecco's modified Eagle's minimal

essential medium (DMEM, Invitrogen) supplemented with 10% fetal bovine serum. All cell lines were propagated at 37°C in an atmosphere containing 5% CO<sub>2</sub>.

### **Immunoprecipitation, PreScission Protease Cleavage and Immunoblotting**

Protein extraction from both yeast and mammalian cells was carried out using methods previously described (Mollapour and Neckers 2011). For immunoprecipitation, mammalian cell lysates were incubated with Anti-FLAG M2 agarose (Sigma) for 2hr at 4°C. Yeast cell lysates were incubated with Ni-NTA agarose (Qiagen) for 2hr at 4°C. Immunopellets were washed 4 times with fresh lysis buffer (20mM HEPES (pH 7.0), 100mM NaCl, 1mM MgCl<sub>2</sub>, 0.1% NP40, protease inhibitor cocktail (Roche) and PhosSTOP (Roche)). Proteins bound to Ni-NTA agarose were washed with 50mM imidazole in lysis buffer (20mM Tris-HCl (pH 7.5), 100mM NaCl, protease inhibitor cocktail and PhosSTOP) and eluted with either 300mM imidazole in lysis buffer or with 5x Laemmli buffer. Precipitated proteins were separated by SDS-PAGE and transferred to nitrocellulose membranes. Co-immunoprecipitated proteins were detected by immunoblotting with indicated antibodies recognizing Hexa-His and pan-phosphothreonine (Qiagen),  $\alpha$ -tubulin (Affinity Bioreagents), Hsp86 N-domain (Affinity BioReagents), FLAG (Sigma-Aldrich), GR, Cdk4, ErbB2, Mpk1/Slt2, Cdc14, Mps1 (Santa Cruz), c-Myc, GST, p60<sup>Hop</sup>, p50<sup>cdc37</sup> (Cell Signalling Technology), p23 (Affinity Bioreagents), and hAha1 (StressMarq). Yeast co-chaperones were detected with antibody to Sti1<sup>Hop</sup> (a kind gift from Dr. Daniel C. Masison, NCI, USA), Cdc37<sup>p50</sup> and yAha1 (NCI, USA), Sba1 (Institute of Cancer Research, UK). PreScission Protease cleavage was achieved by incubating yHsp90His<sub>6</sub> bound to Ni-NTA agarose with 2 units

of PreScission Protease in 50mM Tris-HCl, 150mM NaCl, 1 M EDTA, 1mM DTT (pH 7.0) at 5°C for 16hr.

### **Assays for Hsp90 Client Activity**

Yeast strains were transformed with either *HSE-lacZ* (Mollapour et al. 2010), or co-transformed with the centromeric *HIS3* vector pHCA/rGR constitutively expressing glucocorticoid receptor (GR) under control of the alcohol dehydrogenase promoter (*ADH1*) (Garabedian and Yamamoto 1992), and the GR reporter vector p $\Delta$ S26X, a *URA3* vector which expresses  $\beta$ -galactosidase (encoded by *lacZ*) as a reporter gene under control of a promoter bearing 3 $\times$ GR response elements (Schena et al. 1989). Transformants were selected by SD medium supplemented with appropriate amino acids without leucine, uracil and histidine. Yeast cells were grown overnight to exponential phase with a cell density of 2-3 $\times 10^6$  cells per ml in 50ml of the same medium at 30°C. Dexamethasone (DEX) was added to a final concentration of 30 $\mu$ M, followed by incubation at 30°C for 2.5hr to activate the receptors. Cells were collected by centrifugation (2000 $\times$ g; 5min), washed once with dH<sub>2</sub>O, and frozen at -80°C. Proteins were extracted as previously described, except for exclusion of EDTA in the extraction buffer.  $\beta$ -galactosidase activities of GR or HSE were measured as previously described (Nathan and Lindquist 1995). Cell lysate (10 $\mu$ l) was mixed with an equal volume of 2 $\times$  buffer Z (0.12M Na<sub>2</sub>HPO<sub>4</sub>•7H<sub>2</sub>O, 0.08M NaH<sub>2</sub>PO<sub>4</sub>•H<sub>2</sub>O, 0.02M KCl, 0.002M MgSO<sub>4</sub>, pH 7.0). The mixture was added to 700 $\mu$ l of 2mg/ml ONPG solution in 1 $\times$  buffer Z pre-warmed at 30°C and incubated at 30°C for 5-30min. The reaction was stopped by adding 500 $\mu$ l of 1M sodium carbonate. The optical density (OD<sub>420</sub>) of each

reaction mixture was determined. The protein concentration of the lysate was determined using a BioRad protein assay (BioRad).  $\beta$ -galactosidase activity was calculated using the following formula: enzyme activity =  $1000 \times OD_{420} / \text{minute} / [10 \mu\text{l} \times \text{protein concentration } (\mu\text{g}/\mu\text{l})]$ . Ste11 $\Delta$ N induction was analyzed as described previously (Louvion et al. 1998; Flom et al. 2008). Ste11 $\Delta$ N plasmid was a gift of Dr Jill Johnson.

### **Isothermal Titration Calorimetry and $K_d$ Measurements.**

Heat of interaction was measured on a MSC system (Microcal), with a cell volume of 1.458ml, under the same buffer conditions (20mM Tris pH 8.0 containing 1mM EDTA, 5mM NaCl and 7mM MgCl<sub>2</sub>) at 30 °C. For AMPPNP interactions, 20 aliquots of 14.8 $\mu$ l of 1mM AMPPNP were injected into 50 $\mu$ M wild type or mutant T101A or T101E yeast Hsp90. For geldanamycin binding the buffer system contained 2% DMSO. In total 10 aliquots of 27 $\mu$ l of 150 $\mu$ M geldanamycin were injected into 10 $\mu$ M yeast Hsp90 wild type or mutant T101A or T101E. Heat of dilution was determined in a separate experiment by diluting protein into buffer, and the corrected data fitted using a nonlinear least square curve-fitting algorithm (Microcal Origin) with three floating variables: stoichiometry, binding constant and change in enthalpy of interaction.

### **Flow Cytometric Analysis (FACS Analysis)**

FACS analysis was performed as described previously (Mollapour et al. 2010). Yeast cells ( $1 \times 10^7$ ) were collected by centrifugation (16,000 $\times$ g; 30s) and washed with 1ml ice-cold water and fixed with 1ml of 70% ethanol. Fixed cells (0.3ml) were pelleted by

centrifugation (16,000×g; 30s) and washed with 1ml of 50mM sodium citrate. The cells were pelleted by centrifugation (16,000×g; 30s) and resuspended with 0.5ml of 50mM sodium citrate containing 0.1mg/ml RNase. The cell suspension was incubated for 2 hours at 37°C, followed by addition of 0.5ml of 50mM sodium citrate containing 4µg/ml propidium iodide. The stained cells were analyzed via a FACScan flow cytometer (BD LSRFORTESSA).

### **Hsp90 ATPase Activity *in vitro***

ATPase activities were measured using a method previously described (Panaretou et al. 1998). This is an enzyme-coupled assay using typically 2µM pure yeast Hsp90 and T101A and T101E mutants. All activities are averages of three separate measurements (Prodromou et al. 2000).

### **Hsp90 ATPase Activity *in vivo***

ATPase activity of yHsp90-His6, T101A and T101E mutants isolated from yeast was measured as previously described (Kamal et al. 2003) with the following exceptions. Following protein extraction and pull-down experiments as described in the Materials and Methods, protein-bound Ni-NTA (Qiagen) were washed five times in 0.5M NaCl and 1% NP40 buffer. Proteins were competed off the beads with 300µM imidazole, at 4°C for 1hr with agitation. Protein was then concentrated with Amicon® Ultra-2 ml, 10K centrifugal filters (Millipore). Using the Micro BCA™ Protein Assay Kit (Thermo Scientific), protein was quantified and 1µg was run on an SDS-PAGE gel as described previously to standardize the amount of protein used in the assay. Assay was



performed as described in the P<sub>i</sub>Per™ Phosphate Assay Kit instructions for use (Life Technologies). Standard curve with linear fit line was created from 0-100μM final concentration reactions. 2.5μg of yHsp90 and phospho-T101 mutants were incubated at 37°C for 1hr with 100mM ATP as substrate, with or without 10μM ganetespib (Synta Pharmaceuticals). ATP turnover was calculated as mmol P<sub>i</sub> per mol yHsp90 per minute, and relative ATPase activity was calculated from those values, with the value of Hsp90α alone representing 100% activity.

### **Purification of the yHsp90 Interactome From Yeast**

Three biological replicates of 100ml of yeasts expressing either yHsp90-T101A-His<sub>6</sub> or yHsp90-T101E-His<sub>6</sub> were grown on YPDA to an OD<sub>600</sub> of 1. Cells were harvested and HIS<sub>6</sub>-tagged yHsp90, along with the associated interactome was isolated as follows: Protein was extracted via bead beating in 500μl Binding/Wash Buffer (50mM Na-phosphate pH 8.0, 300mM NaCl, 0.01% Tween-20). 200μg of protein extract was incubated with 50μl His-Tag Dynabeads (Invitrogen) at 4°C for 15min. Dynabeads were collected by magnet then washed 5 times with 500μl Binding/Wash buffer. After final wash, buffer was aspirated and beads were incubated with 100μl Elution buffer (300mM imidazole, 50mM Na-phosphate pH 8.0, 300mM NaCl, 0.01% Tween-20) for 20min, then beads were collected via magnet. The supernatant containing purified yHsp90-His<sub>6</sub> and associated interactome was transferred to a fresh tube, 25μl of 5x SDS-PAGE sample buffer was added and the sample was denatured by boiling for 5min at 95°C. 10μl of sample was analyzed by SDS-PAGE.

### **Trypsin Digests of yHsp90 Complexes From SDS-PAGE Gels**

Purified yHsp90-T101A-His<sub>6</sub> or yHsp90-T101E-His<sub>6</sub> complexes were loaded onto a 12% MOPS buffered SDS-PAGE gel (Invitrogen) and run for 10min at 200v resulting in a ~2cm “gel plug”. The gel was stained with 25ml Imperial Stain (Pierce) at room temperature, and destained overnight in dH<sub>2</sub>O at 4°C. The gel plugs for each sample to be analyzed were excised by sterile razor blade, divided into 2 sections ~1cm each, and chopped into ~1mm<sup>3</sup> pieces. Each section was washed in dH<sub>2</sub>O and destained using 100mM NH<sub>4</sub>HCO<sub>3</sub> pH 7.5 in 50% acetonitrile. A reduction step was performed by addition of 100µl 50mM NH<sub>4</sub>HCO<sub>3</sub> pH 7.5 and 10µl of 200mM Tris (2-carboxyethyl) phosphine HCl at 37°C for 30min. The proteins were alkylated by addition of 100µl of 50mM iodoacetamide prepared fresh in 50mM NH<sub>4</sub>HCO<sub>3</sub> pH 7.5 buffer, and allowed to react in the dark at 20°C for 30min. Gel sections were washed in water, then acetonitrile, and vacuum dried. Trypsin digestion was carried out overnight at 37°C with 1:50-1:100 enzyme–protein ratio of sequencing grade-modified trypsin (Promega) in 50mM NH<sub>4</sub>HCO<sub>3</sub> pH 7.5, and 20mM CaCl<sub>2</sub>. Peptides were extracted with 5% formic acid and vacuum dried.

### **Isotopic labeling of trypsin-digested yHsp90 complexes**

Peptide digests were reconstituted with 70µl of Tris–HCl Buffer Solution (10mM of Tris–HCl, 150mM NaCl, 20mM CaCl<sub>2</sub>, pH 7.6), vortexed for at least 20min to reconstitute the peptide mixture, then split into two vials of 30µl each (<sup>16</sup>O vial and <sup>18</sup>O vial), and 10ul was retained unlabeled and stored in -80°C. In a separate vial Mag-Trypsin beads (Clontech) were prepared as follows. 30ul mag-trypsin beads per rxn (<sup>16</sup>O or <sup>18</sup>O) were

pooled and washed 3 times with 800µl of Tris–HCl Buffer Solution, then brought back up in 30µl/sample of Tris-HCl buffer, and aliquoted to a new 1.5ml vial in the quantity of 30µl, vortexing lightly after each aliquot to keep the mag-trypsin beads in suspension. Using a magnetic rack, the Tris-HCl buffer was removed from the beads, and the 30µl of sample digest from above was added to the beads and vacuum dried. 30µl of either  $^{16}\text{O}$   $\text{H}_2\text{O}$  or 97%  $^{18}\text{O}$   $\text{H}_2\text{O}$  (Cambridge Isotopes Laboratories) was added to the respective  $^{16}\text{O}$  or  $^{18}\text{O}$  prepared Mag-Trypsin bead vial and vortexed for 20min to reconstitute the peptide mixture, and allowed to exchange overnight at 37°C. After  $^{18}\text{O}$  exchange, the solution was transferred to a new vial and any free trypsin in solution was inactivated with 1mM PMSF for 30min at 4°C. For each sample section, the (yHsp90-T101E/yHsp9-T101A) digests were combined 1:1 as follows: Forward (FWD) Sample Set: (F)- $^{16}\text{O}$ :(E)- $^{18}\text{O}$  and Reversed (REV) Sample Set: (E)- $^{16}\text{O}$ :(F)- $^{18}\text{O}$ , dried and stored at –80°C until analysis. Three biological replicate experiments were performed.

### **HPLC for mass spectrometry**

All samples were re-suspended in Burdick & Jackson HPLC-grade water containing 0.2% formic acid (Fluka), 0.1% TFA (Pierce), and 0.002% Zwittergent 3–16 (Calbiochem), a sulfobetaine detergent that contributes the following distinct peaks at the end of chromatograms:  $\text{MH}^+$  at 392, and in-source dimer [ $2\text{M} + \text{H}^+$ ] at 783, and some minor impurities of Zwittergent 3–12 seen as  $\text{MH}^+$  at 336. The peptide samples were loaded to a 0.25µl  $\text{C}_8$  OptiPak trapping cartridge custom-packed with Michrom Magic (Optimize Technologies)  $\text{C}_8$ , washed, then switched in-line with a 20cm by 75µm  $\text{C}_{18}$  packed spray tip nano column packed with Michrom Magic  $\text{C}_{18}\text{AQ}$ , for a 2-step

gradient. Mobile phase A was water/acetonitrile/formic acid (98/2/0.2) and mobile phase B was acetonitrile/isopropanol/water/formic acid (80/10/10/0.2). Using a flow rate of 350nl/min, a 90min, 2-step LC gradient was run from 5% B to 50% B in 60min, followed by 50%–95% B over the next 10min, hold 10min at 95% B, back to starting conditions and re-equilibrated.

### **LC–MS/MS analysis**

The samples were analyzed via electrospray tandem mass spectrometry (LC–MS/MS) on a Thermo Q-Exactive Orbitrap mass spectrometer, using a 70,000 RP survey scan in profile mode, m/z 360–2000 Da, with lockmasses, followed by 10 MS/MS HCD fragmentation scans at 17,500 resolution on doubly and triply charged precursors. Single charged ions were excluded, and ions selected for MS/MS were placed on an exclusion list for 60s.

### **LC–MS/MS data analysis, statistical analysis**

Interactomes of yHsp90-T101A-His<sub>6</sub> and yHsp90-T101E-His<sub>6</sub> were analyzed as described previously (Truman et al. 2012). All LC-MS/MS \*.raw Data files were analyzed with MaxQuant version 1.2.2, searching against the SPROT Human database using the following criteria: <sup>18</sup>O heavy label was selected for quantitation with a min of 1 high confidence peptide to assign quantitation H/L ratio. Trypsin was selected as the protease with max miss cleavage set to 2. Carbamidomethyl (C) was selected as a fixed modification. Variable modifications were set to Oxidization (M), Formylation (n-term), and Phosphorylation (STY). Orbitrap mass spectrometer was selected using an

MS error of 20ppm and a MS/MS error of 0.5Da. 1% FDR cutoff was selected for peptide, protein, and site identifications.

Ratios were reported based on the MS level light and heavy peak areas determined by MaxQuant and reported in the proteinGroups.txt file as heavy/light or (T101E/T101A mutant). Proteins were removed from this results file if they were flagged by MaxQuant as “Contaminants”, “Reverse” or “Only identified by site”. Complete three biological replicates were performed, with each biological replicate split into two technical replicates (<sup>18</sup>O forward (FWD) labeling, and <sup>18</sup>O reverse (REV) labeling). The abundance data from each biological replicate were normalized to the ratio of the bait protein in that run (e.g. normalized to the yHsp90-His<sub>6</sub> ratio). Light and Heavy peak intensities were analyzed in each run to determine protein hits that fell into the category of either yHsp90-T101E-only hits or yHsp90-T101A-only hits and retained if they confirmed to this state across all 6 runs. In the case of yHsp90-T101E-only or yHsp90-T101A-only protein hits, spectra counts can be used as a proxy for abundance as these would not of been assigned a quantitation ratio. This produced a list of yHsp90 interactors and their respective quantitated changes between yHsp90-T101E and yHsp90-T101A.

Further statistical analysis was performed using the R statistical package (<http://www.r-project.org/>). Proteins with three out of the six observations were retained. Missing values were imputed using row mean imputation. An ANOVA test was then performed to identify proteins that indicate significant variability (p-value < 0.05) between biological replicates within each group. These were removed from consideration. A list of proteins identified and corresponding ratios can be found in Table S1. The mass spectrometry

proteomics data have been deposited to the ProteomeXchange Consortium (<http://proteomecentral.proteomexchange.org>) via the PRIDE partner repository with the dataset identifier PXD001969.

## SUPPLEMENTAL REFERENCES

- Adams A, Gottschling DE, Kaiser CA, Stearns T. 1997. *Methods in Yeast Genetics*. Cold Spring Harbor Laboratory Press, Cold Spring Harbor, New York.
- Flom GA, Lemieszek M, Fortunato EA, Johnson JL. 2008. Farnesylation of Ydj1 is required for in vivo interaction with Hsp90 client proteins. *Mol Biol Cell* **19**: 5249-5258.
- Garabedian MJ, Yamamoto KR. 1992. Genetic dissection of the signaling domain of a mammalian steroid receptor in yeast. *Mol Biol Cell* **3**: 1245-1257.
- Kamal A, Thao L, Sensintaffar J, Zhang L, Boehm MF, Fritz LC, Burrows FJ. 2003. A high-affinity conformation of Hsp90 confers tumour selectivity on Hsp90 inhibitors. *Nature* **425**: 407-410.
- Louvion JF, Abbas-Terki T, Picard D. 1998. Hsp90 is required for pheromone signaling in yeast. *Mol Biol Cell* **9**: 3071-3083.
- Millson SH, Truman AW, Racz A, Hu B, Panaretou B, Nuttall J, Mollapour M, Soti C, Piper PW. 2007. Expressed as the sole Hsp90 of yeast, the alpha and beta isoforms of human Hsp90 differ with regard to their capacities for activation of certain client proteins, whereas only Hsp90beta generates sensitivity to the Hsp90 inhibitor radicicol. *FEBS J* **274**: 4453-4463.
- Mollapour M, Neckers L. 2011. Detecting HSP90 phosphorylation. *Methods Mol Biol* **787**: 67-74.
- Mollapour M, Tsutsumi S, Donnelly AC, Beebe K, Tokita MJ, Lee MJ, Lee S, Morra G, Bourboulia D, Scroggins BT et al. 2010. Swe1Wee1-dependent tyrosine phosphorylation of Hsp90 regulates distinct facets of chaperone function. *Mol Cell* **37**: 333-343.
- Nathan DF, Lindquist S. 1995. Mutational analysis of Hsp90 function: interactions with a steroid receptor and a protein kinase. *Mol Cell Biol* **15**: 3917-3925.
- Panaretou B, Prodromou C, Roe SM, O'Brien R, Ladbury JE, Piper PW, Pearl LH. 1998. ATP binding and hydrolysis are essential to the function of the Hsp90 molecular chaperone in vivo. *EMBO J* **17**: 4829-4836.
- Prodromou C, Panaretou B, Chohan S, Siligardi G, O'Brien R, Ladbury JE, Roe SM, Piper PW, Pearl LH. 2000. The ATPase cycle of Hsp90 drives a molecular 'clamp' via transient dimerization of the N-terminal domains. *EMBO J* **19**: 4383-4392.
- Schena M, Freedman LP, Yamamoto KR. 1989. Mutations in the glucocorticoid receptor zinc finger region that distinguish interdigitated DNA binding and transcriptional enhancement activities. *Genes Dev* **3**: 1590-1601.

Truman AW, Kristjansdottir K, Wolfgeher D, Hasin N, Polier S, Zhang H, Perrett S, Prodromou C, Jones GW, Kron SJ. 2012. CDK-dependent Hsp70 Phosphorylation controls G1 cyclin abundance and cell-cycle progression. *Cell* **151**: 1308-1318.
